# Supplementary material for: Development of a multidimensional military readiness assessment
Source: PubMed Central journal article supplement (PMC10987742; doi:10.3389/fresc.2024.1345505), 2024-03-20

# REDOp2 Report

Session: 221027\_0900

## Patient Info

Age: 36                      Army, COL, 38W  
Height: 1.30 m  
Weight: 75.00 kg    **Injury:**  
**Heart Rate:**              Left: Amputation, Below Knee, Details  
Resting: 60 bpm            Right: None, None,  
Max: 184 bpm

## Session Settings

**Standard**  
Speed: 1.60 m/s                      Interval: 400 m  
# Sprint                      # Tracking                      # Ambush                      # Recon

## Session Summary

Distance: 3003.2 m                      Time: 15:13                      Outcome: Pain, ouch  
RPE: 15                      **Scores:**                      **Gait Measures:**  
Pain: 3 l foot, 1 back                      Tracking: 73.4%                      Step Width: 7.5 (6.6) cm  
**Heart Rate:**                      Recon: 0.4 error rate                      Step Length: 0.7 (0.1) m  
Recovery: 90, 80, 60 bpm                      Accuracy: 73.2%                      Step Time: 0.63 (0.14) s  
Avg: 109 bpm                      Max: 151 bpm                      Precision: 73.2%                      Dynamic Stability: 0.50  
Reaction Time: 1.23 s

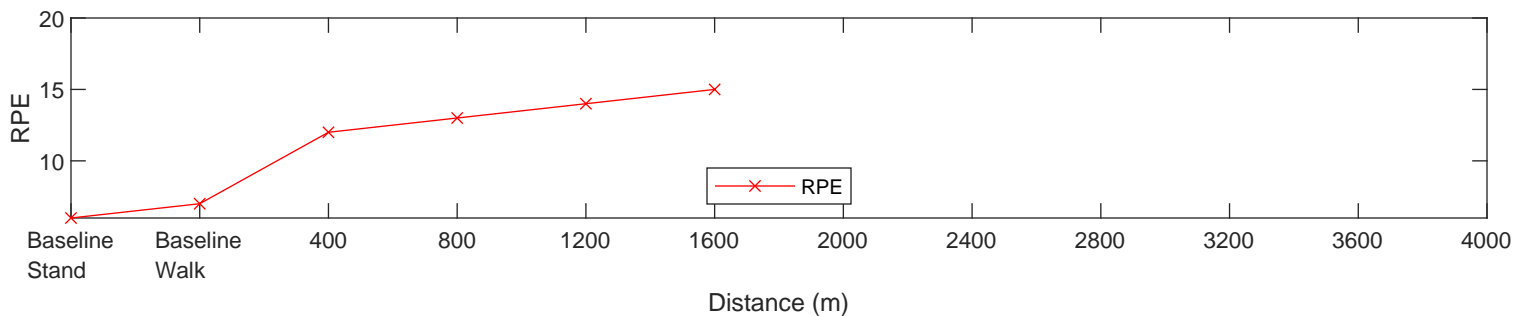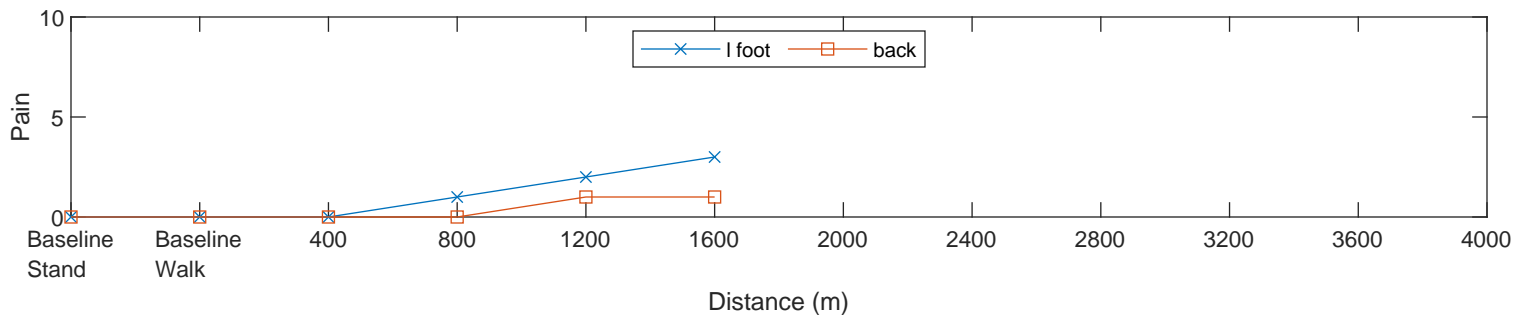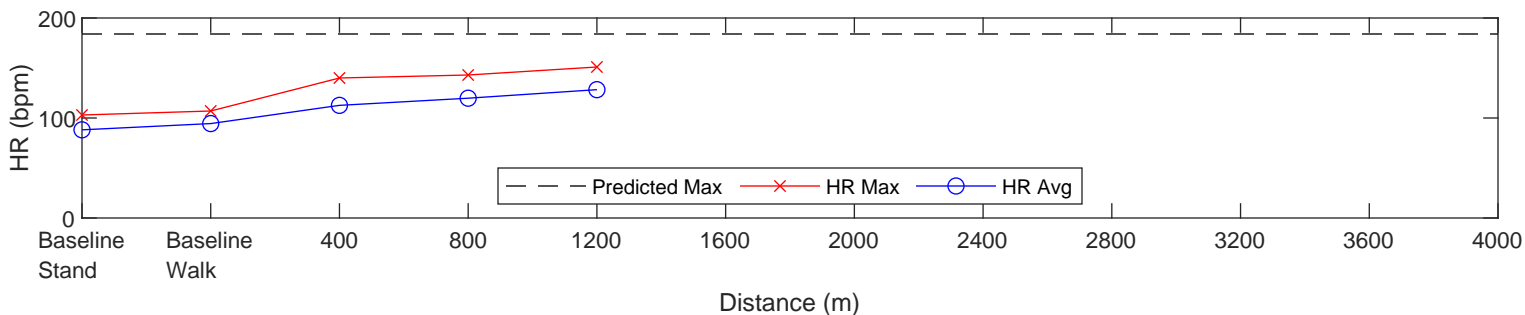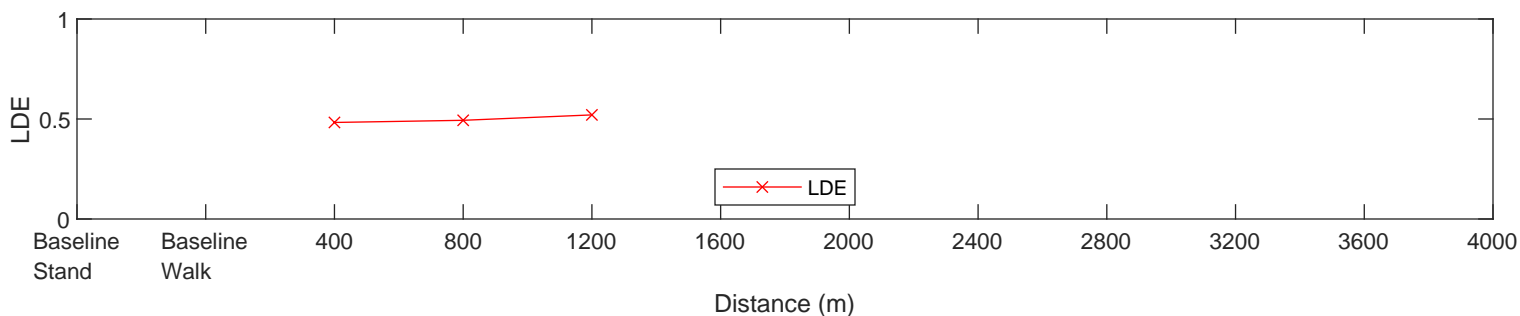

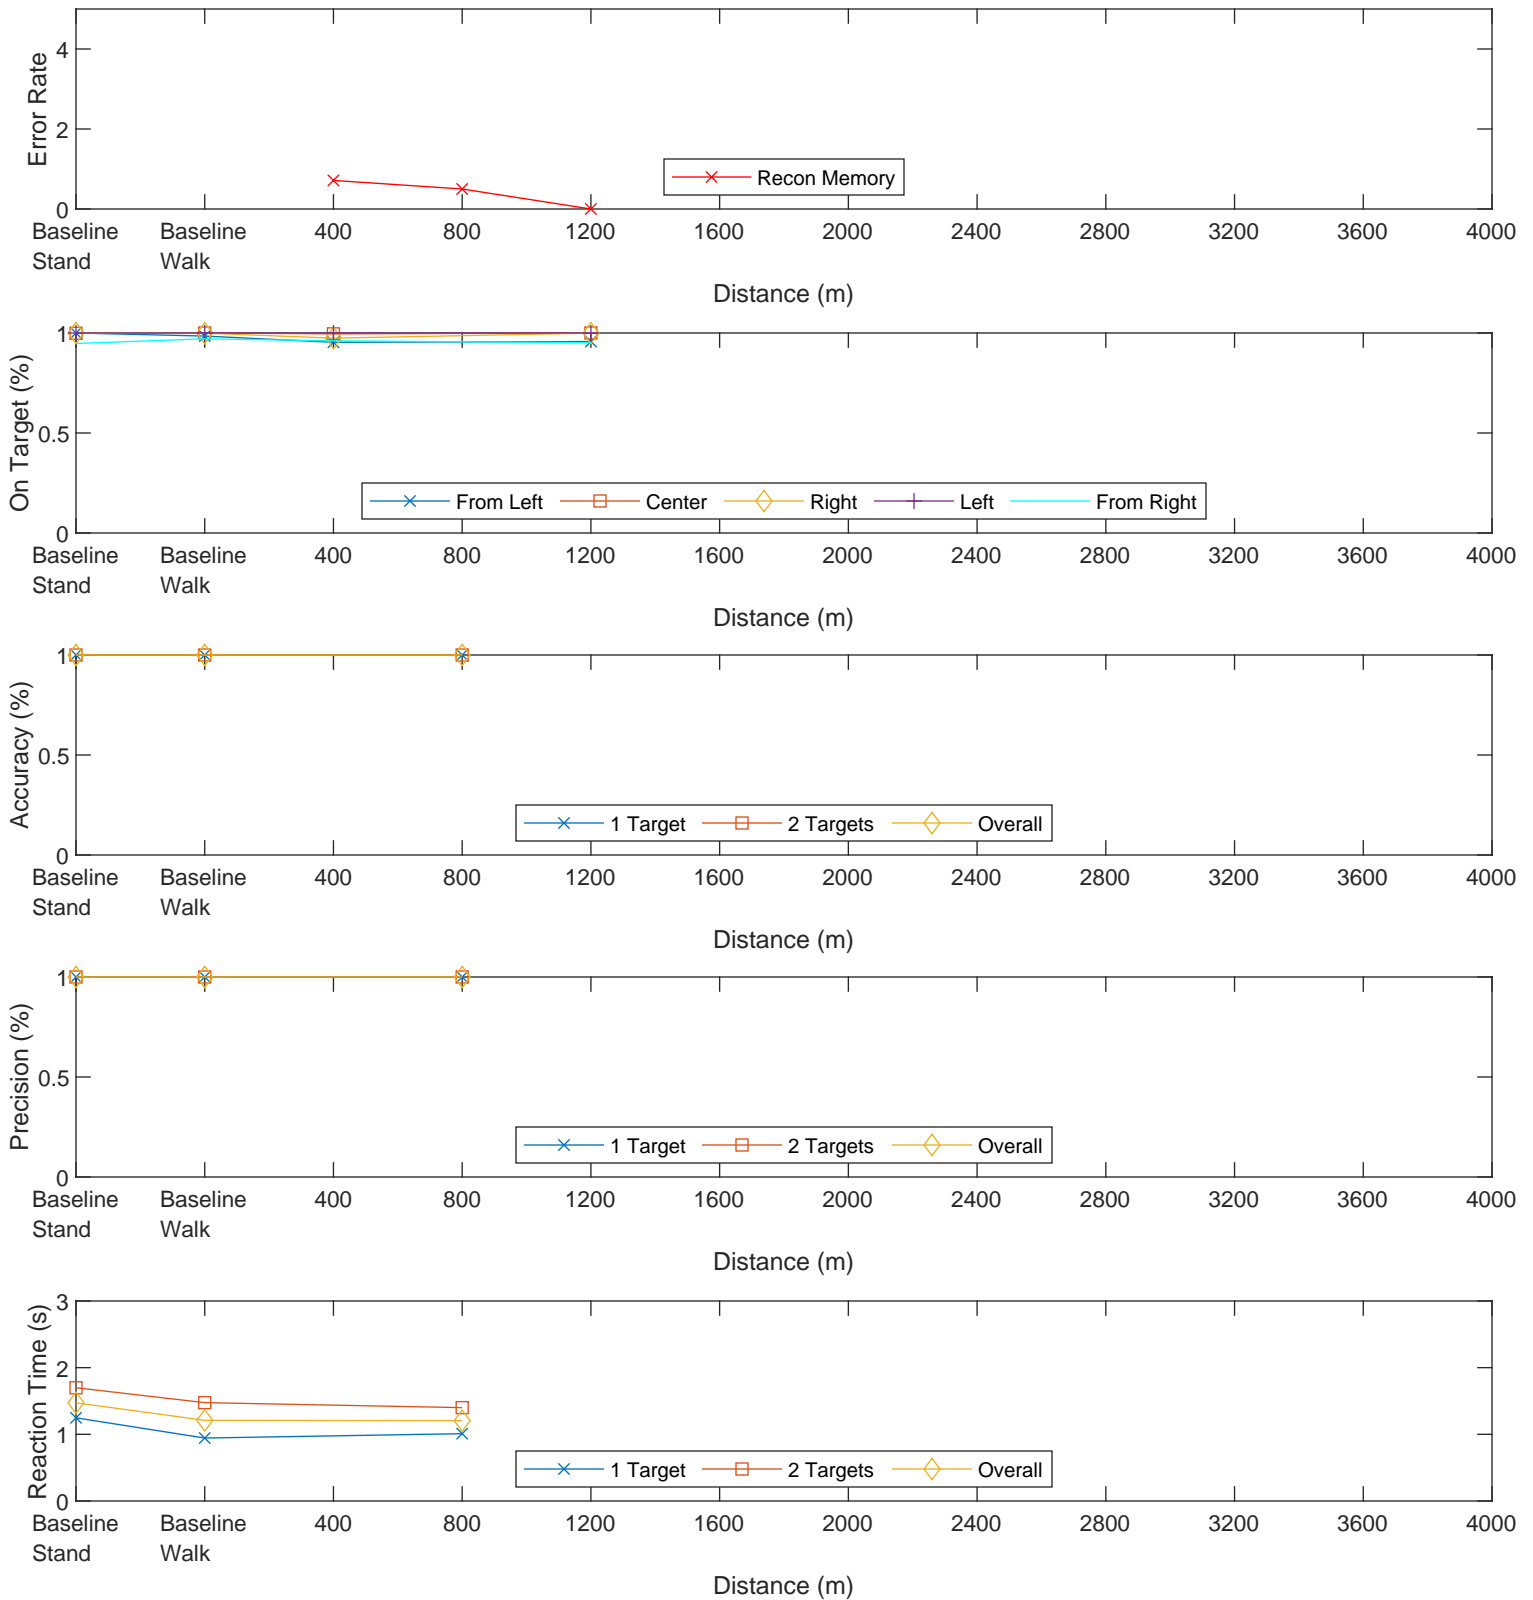

Supplement: Datasheet1.pdf [file Datasheet1.pdf]
